# Supplementary material
Source: Springer Nature journal article supplement (https://www.springermedizin.de/resource/supplementary/12885_2012_3682_MOESM3_ESM.pdf/9464144)
Supplement: MOESM3 [file 9464144]

**Supplementary table 2 Analyses of clinico-pathological data and DTC-status after treatment for patients with  $3 \geq$  DTCs at BM2**

| Histopathological data     | $3 \geq$ DTCs and positive for DTC after treatment (n=5) No (%) <sup>a</sup> |        | $3 \geq$ DTCs and negative for DTC after treatment (n=12) No (%) <sup>a</sup> |        |
|----------------------------|------------------------------------------------------------------------------|--------|-------------------------------------------------------------------------------|--------|
| pT-status:                 |                                                                              |        |                                                                               |        |
| pT1c                       | 2                                                                            | (33.3) | 4                                                                             | (66.7) |
| pT2                        | 3                                                                            | (27.3) | 8                                                                             | (72.7) |
| pN-status:                 |                                                                              |        |                                                                               |        |
| pN0                        | 1                                                                            | (16.7) | 5                                                                             | (83.3) |
| pN1                        | 2                                                                            | (40.0) | 3                                                                             | (60.0) |
| pN2                        | 2                                                                            | (50)   | 2                                                                             | (50.0) |
| pN3                        | 0                                                                            | (0)    | 2                                                                             | (100)  |
| pN0 vs. pNpos:             |                                                                              |        |                                                                               |        |
| pN0                        | 1                                                                            | (16.7) | 5                                                                             | (83.3) |
| pNpos                      | 4                                                                            | (36.4) | 7                                                                             | (63.6) |
| Histology:                 |                                                                              |        |                                                                               |        |
| IDC                        | 3                                                                            | (23.1) | 10                                                                            | (76.9) |
| ILC                        | 2                                                                            | (50.0) | 2                                                                             | (50.0) |
| Histological grade:        |                                                                              |        |                                                                               |        |
| Grade 1                    | 0                                                                            | (0)    | 1                                                                             | (100)  |
| Grade 2                    | 4                                                                            | (40.0) | 6                                                                             | (60.0) |
| Grade 3                    | 1                                                                            | (16.7) | 5                                                                             | (83.3) |
| Grade 1&2 vs. Grade3:      |                                                                              |        |                                                                               |        |
| Grade1&2                   | 4                                                                            | (36.4) | 7                                                                             | (63.6) |
| Grade3                     | 1                                                                            | (16.7) | 5                                                                             | (83.3) |
| ER-status:                 |                                                                              |        |                                                                               |        |
| Pos                        | 5                                                                            | (35.7) | 9                                                                             | (64.3) |
| Neg                        | 0                                                                            | (0)    | 3                                                                             | (100)  |
| PgR-status:                |                                                                              |        |                                                                               |        |
| Pos                        | 3                                                                            | (23.1) | 10                                                                            | (76.9) |
| Neg                        | 2                                                                            | (50.0) | 2                                                                             | (50.0) |
| BM1                        |                                                                              |        |                                                                               |        |
| Positive                   | 3                                                                            | (50.0) | 3                                                                             | (50.0) |
| Negative                   | 2                                                                            | (18.2) | 9                                                                             | (81.8) |
| HER2-status <sup>b</sup> : |                                                                              |        |                                                                               |        |
| Positive =0                |                                                                              |        |                                                                               |        |
| Negative                   | 3                                                                            | (25.0) | 9                                                                             | (75.0) |

<sup>a</sup>The percentages in relation to the clinico-pathological variables

<sup>b</sup>Patients enrolled from June 2005 (n=12)
